# Supplementary material for: Autotransporters Drive Biofilm Formation and Autoaggregation in the Diderm Firmicute Veillonella parvula
Source: PubMed Central journal article supplement (PMC7549365; doi:10.1128/jb.00461-20), 2020-10-08
Supplement: JB.00461-20-s0003.pdf [file JB.00461-20-s0003.pdf]

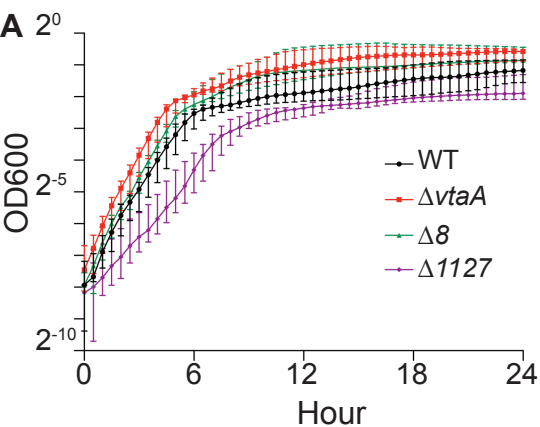

|               | Growth rate |         | Carrying capacity |         |
|---------------|-------------|---------|-------------------|---------|
|               | median      | p-value | median            | p-value |
| WT            | 0.33        |         | 0.41              |         |
| $\Delta vtaA$ | 0.39        | 0.297   | 0.65              | 0.024   |
| $\Delta 8$    | 0.47        | 0.145   | 0.53              | 0.088   |
| $\Delta 1127$ | 0.38        | 0.605   | 0.26              | 0.040   |

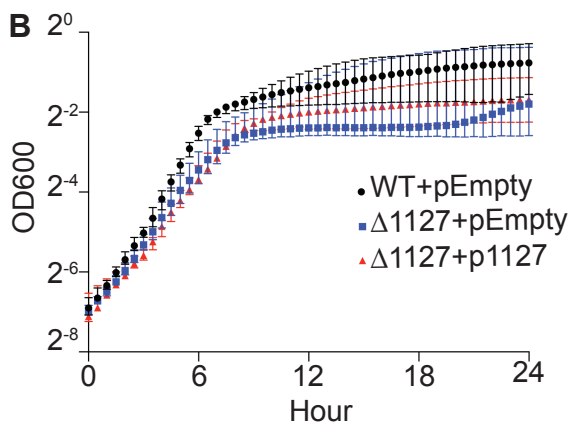

|                       | Growth rate |         | Carrying capacity |         |
|-----------------------|-------------|---------|-------------------|---------|
|                       | median      | p-value | median            | p-value |
| WT+pEmpty             | 0.37        |         | 0.56              |         |
| $\Delta 1127$ +pEmpty | 0.57        | 0.818   | 0.21              | 0.041   |
| $\Delta 1127$ +p1127  | 0.55        | 0.589   | 0.29              | 0.026   |
