# Supplementary material for: Autotransporters Drive Biofilm Formation and Autoaggregation in the Diderm Firmicute Veillonella parvula
Source: PubMed Central journal article supplement (PMC7549365; doi:10.1128/jb.00461-20), 2020-10-08

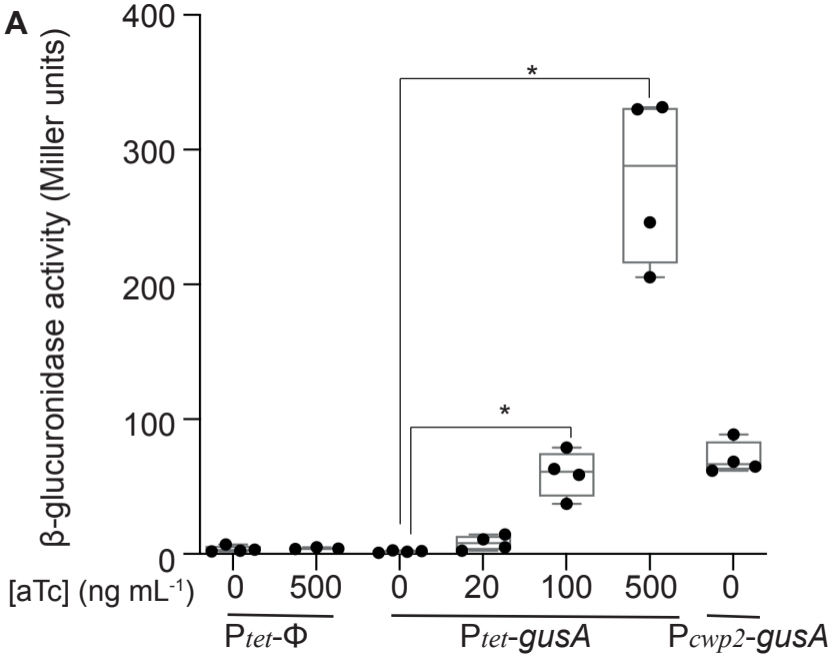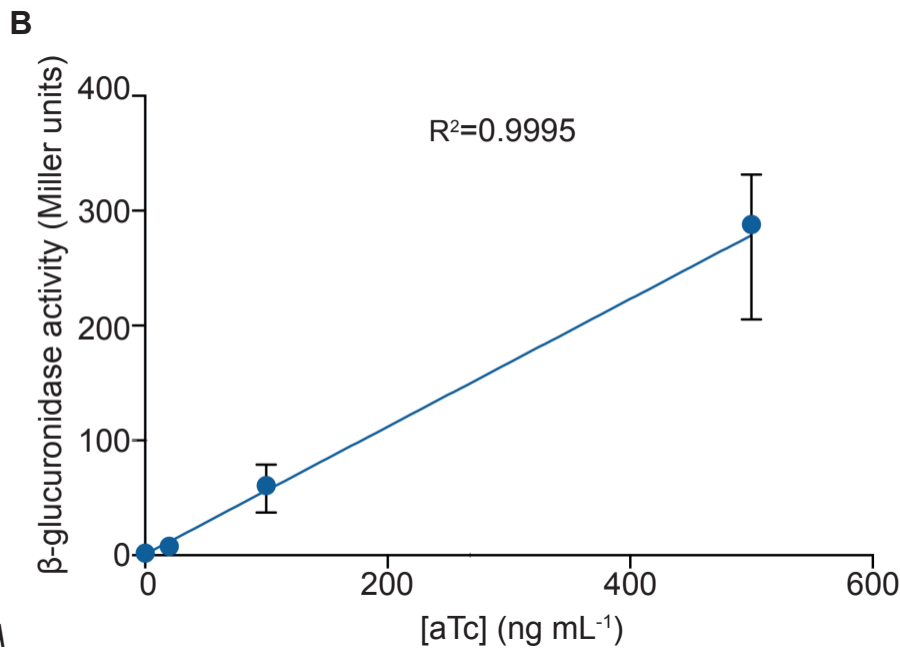

Supplement: JB.00461-20-s0005.pdf [file JB.00461-20-s0005.pdf]
